# Supplementary material for: Dimensions of decision difficulty in women’s decision-making about abortion: A mixed methods longitudinal study
Source: PLOS journal article supplement (doi:10.1371/journal.pone.0212611), 2019-02-22

**S1 Figure. Timing and inclusion of participants in the Dutch Abortion and Mental Health Study (DAMHS) and the qualitative subsample.**

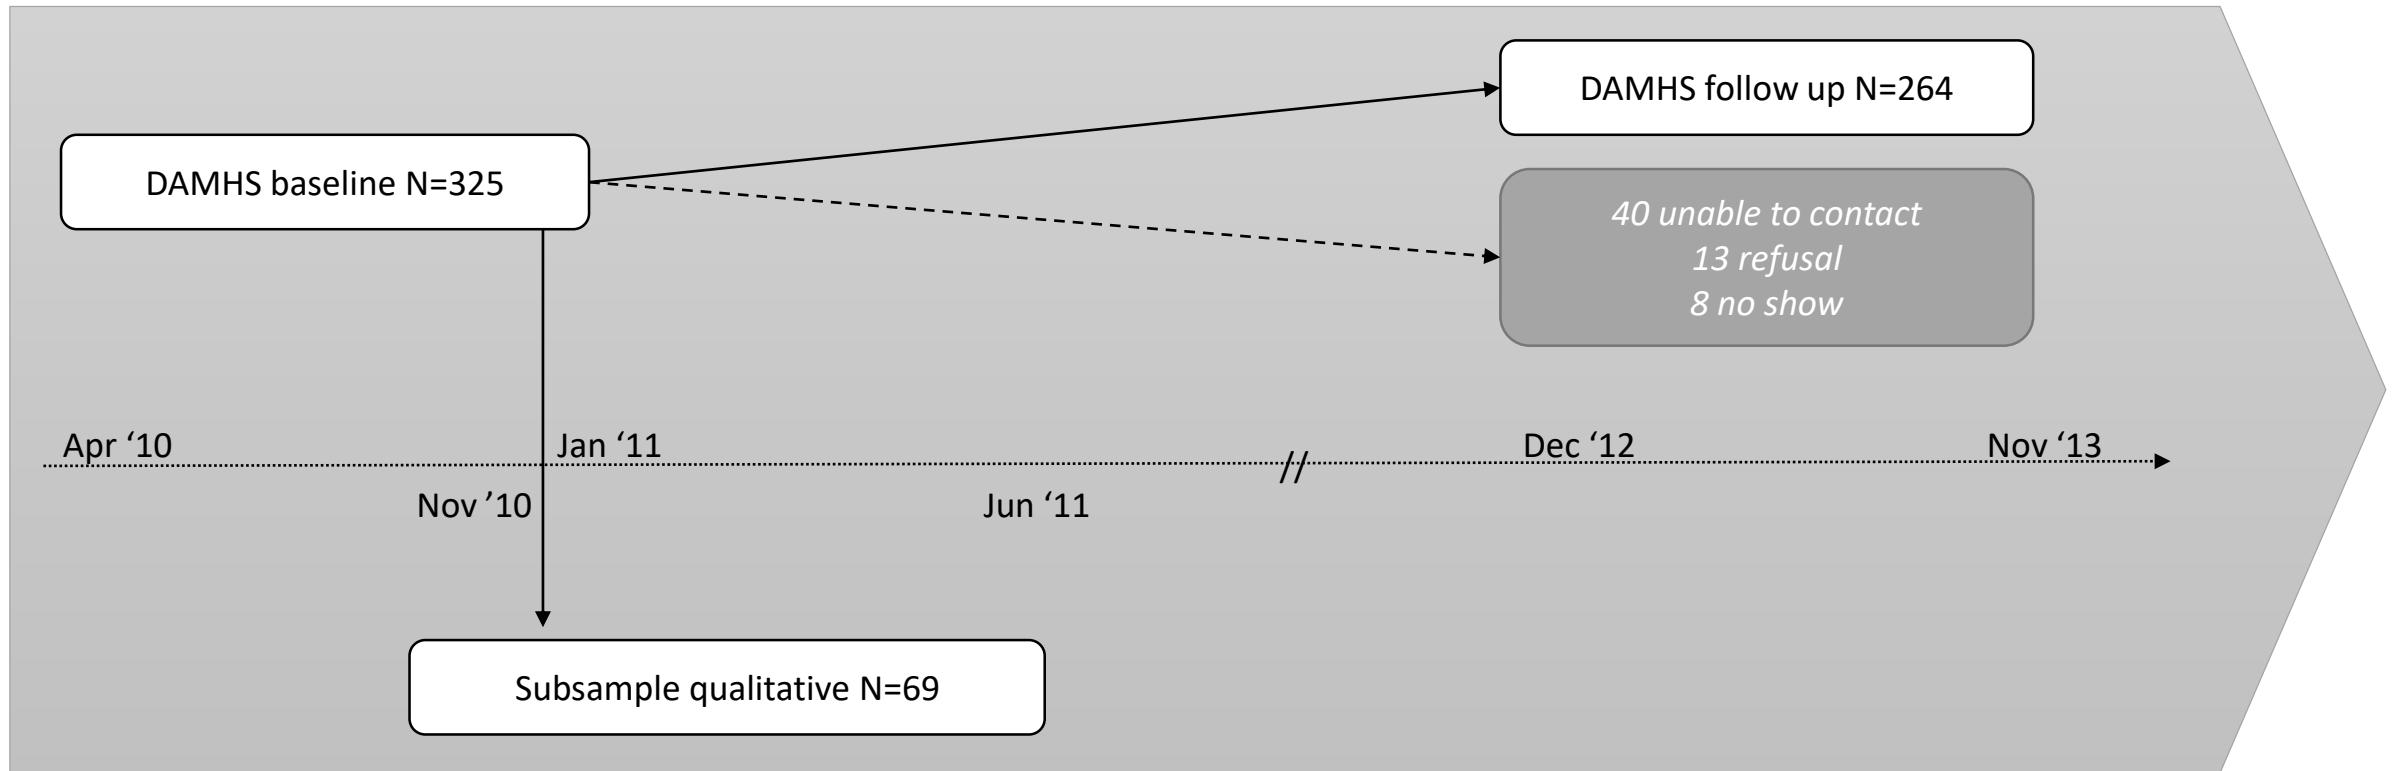

Supplement: S1 (10.1371/journal.pone.0212611.s001) [file journal.pone.0212611.s001]
